# Supplementary material for: Differential active site requirements for NDM-1 β-lactamase hydrolysis of carbapenem versus penicillin and cephalosporin antibiotics
Source: PubMed Central journal article supplement (PMC6207675; doi:10.1038/s41467-018-06839-1), 2018-10-30
Supplement: 41467_2018_6839_MOESM1_ESM.pdf [file 41467_2018_6839_MOESM1_ESM.pdf]

## Supplementary Figure and Tables

Differential active site requirements for NDM-1  $\beta$ -Lactamase hydrolysis of carbapenem versus penicillin and cephalosporin antibiotics

Sun *et al.*

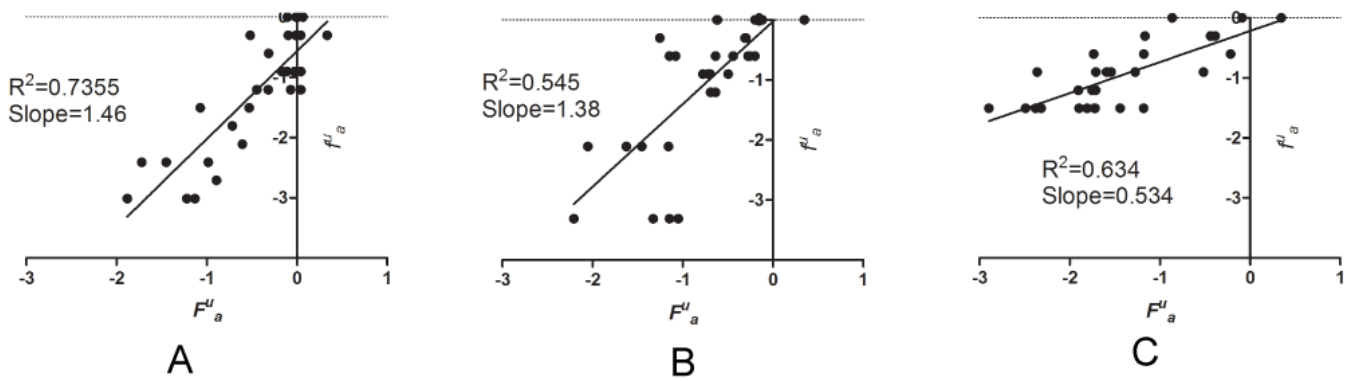

Supplementary Figure 1. Relative fitness of NDM-1 mutants based on sequencing versus antibiotic resistance levels. The relative fitness of individual NDM-1 mutants from the antibiotic selected libraries ( $F_u^a$ ) was calculated based on the frequency of occurrence of the mutant and wild-type alleles from the deep sequencing data for the naïve library and antibiotic-selected libraries as described in Methods. The relative fitness of the mutants based on antibiotic resistance levels ( $f_u^a$ ) was calculated as the logarithm of the resistance level of mutants relative to that of wild type for each antibiotic. The  $f_u^a$  value of each mutant is plotted versus  $F_u^a$  of the corresponding mutant for ampicillin (A), cefotaxime (B) and imipenem (C) experiments and the results of linear regression analysis are shown indicating a correlation between relative fitness determined based on sequencing data versus that determined based on antibiotic resistance levels of individual mutants.

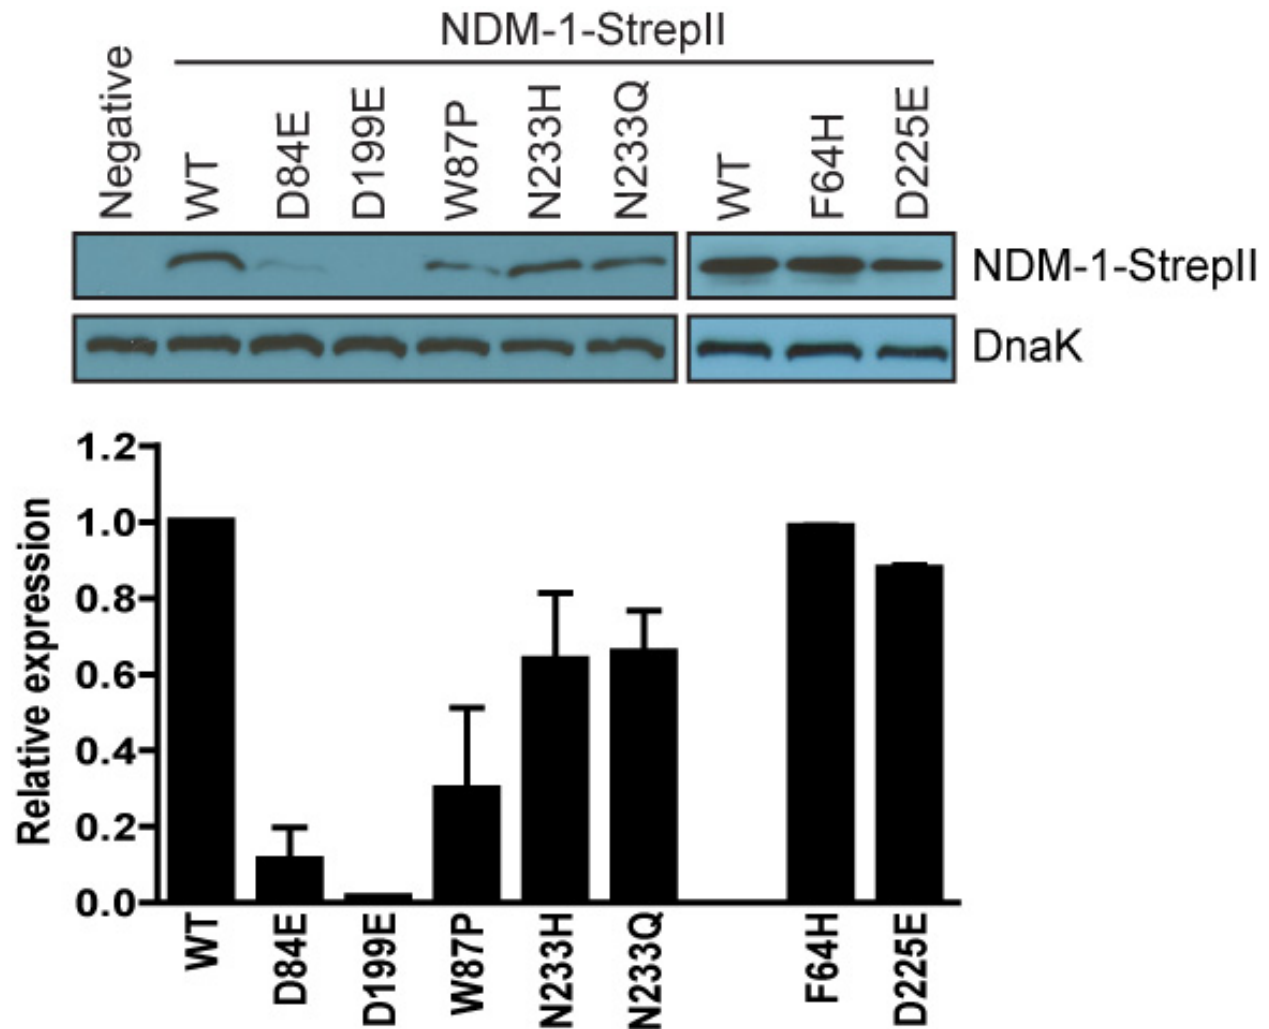

Supplementary Figure 2. *In vivo* steady-state protein levels of NDM-1 wild-type and mutants. Steady-state protein expression levels in *E. coli* of StrepII-tagged wild-type NDM-1 and mutants were determined by SDS-PAGE of whole cell lysates followed by immunoblotting with an anti-StrepII tag monoclonal antibody conjugated to horseradish peroxidase (HRP). Constitutively expressed DnaK (~70 kDa) was used as a loading control and probed with anti-DnaK monoclonal antibody and an HRP-conjugated secondary antibody. The hybridization signal for wild-type and mutant StrepII-tagged NDM-1 and DnaK was quantified by densitometry. The signal for NDM-1 was normalized to that for DnaK in the same sample. Protein expression levels of NDM-1 mutants are shown in the bar graph relative to that of wild-type NDM-1, which was set as 1. Quantification data are based on three independent experiments and a representative blot is shown. The error bars indicate the standard deviation of the protein expression levels based on the repeated experiments.

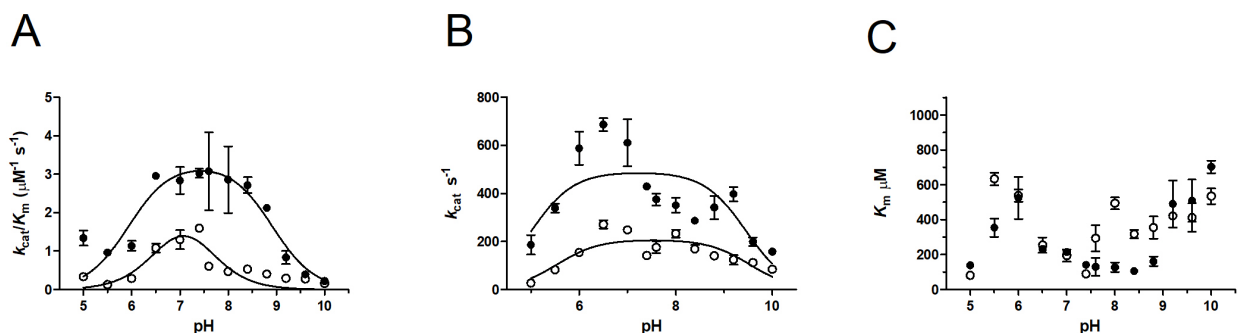

Supplementary Figure 3. pH profile for wild-type NDM-1 and the K224R/G232A/N233Q triple mutant. The pH dependence of  $k_{cat}/K_M$  (A),  $k_{cat}$  (B),  $K_M$  (C) of the wild type (closed circles) and the K224R/G232A/N233Q triple mutant (open circles) NDM-1  $\beta$ -lactamase for ampicillin hydrolysis is shown. The error bars in the plots represent the standard deviations for each data point. Lys224 plays an important role in facilitating substrate binding to the active site through electrostatically interacting with the negatively charged C-3/4 carboxylate group of  $\beta$ -lactam antibiotics. Its substitution by arginine, which also has a positively charged side chain but with a different pK<sub>a</sub> (12.5) from that of lysine (10.5), may change the pH dependence of the charge status of their side chain groups and thus their interactions with  $\beta$ -lactam substrates. To test this hypothesis, the pH dependence of the wild type and K224R/G232A/N233Q mutant enzymes was examined for the hydrolysis of ampicillin. Fitting of the  $k_{cat}$  and  $k_{cat}/K_M$  to a double ionization model produced bell-shaped curves for  $k_{cat}/K_M$  of both wild type and the mutant enzyme. Although the optimum pH for  $k_{cat}/K_M$  is similar for wild type and mutant enzymes, the mutant enzyme exhibited a narrower pH profile (pK<sub>1</sub> = 6.7 and pK<sub>2</sub> = 7.5) than the wild-type enzyme (pK<sub>1</sub> = 5.9 and pK<sub>2</sub> = 8.9). This difference is mainly attributed to the larger fluctuation of the  $K_M$  of the mutant enzyme than that of the wild-type enzyme at pH 5.5-8.5. This indicates that complex formation with ampicillin is more sensitive to pH variation versus the wild-type enzyme.



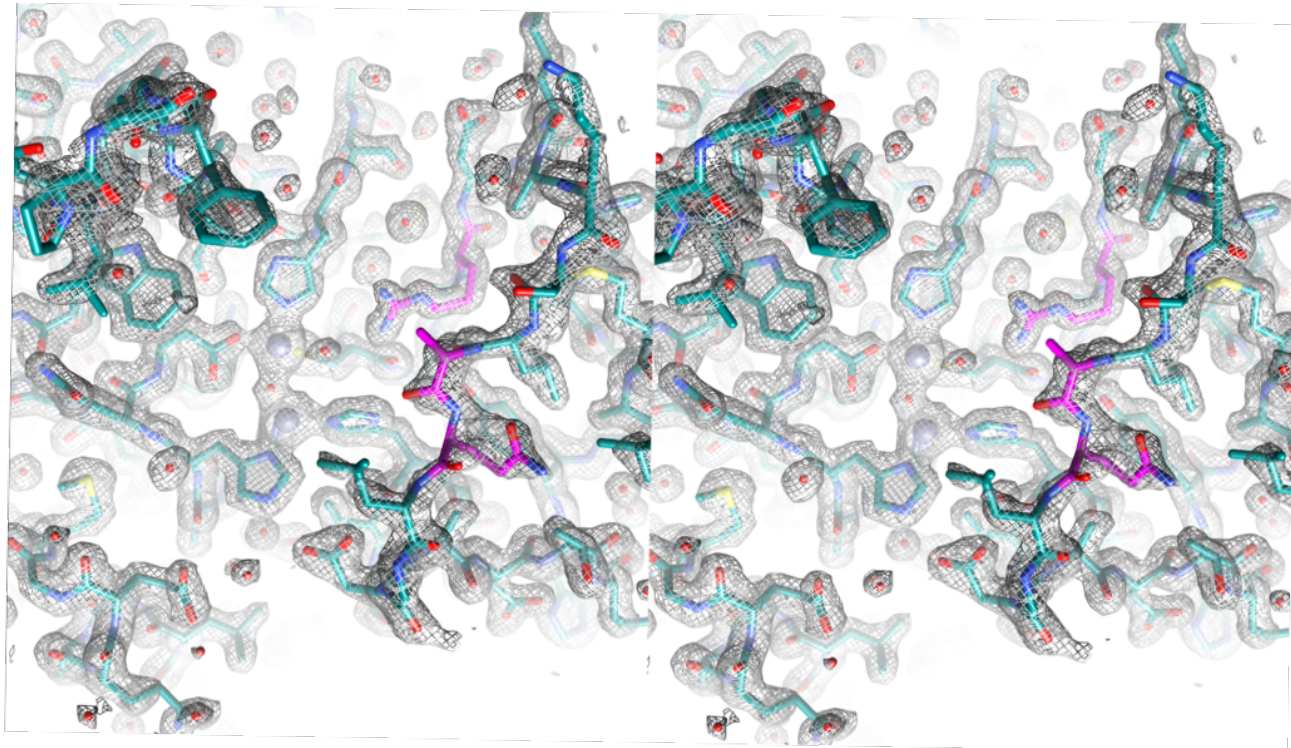

Supplementary Figure 4. Stereo view of the active site of the NDM-1 K224R/G232A/N233Q  $\beta$ -lactamase structure. Electron density is shown of an 2Fo-Fc map contoured at  $1 \sigma$ . Zn1 and Zn2 are shown as gray spheres with Zn1 at top. Residues are represented as stick models with carbons colored dark cyan and non-carbon colored by type (N, blue; O, red; S, yellow). The mutated residues, Arg224, Ala232, and Gln233, are shown with carbon atoms in magenta.

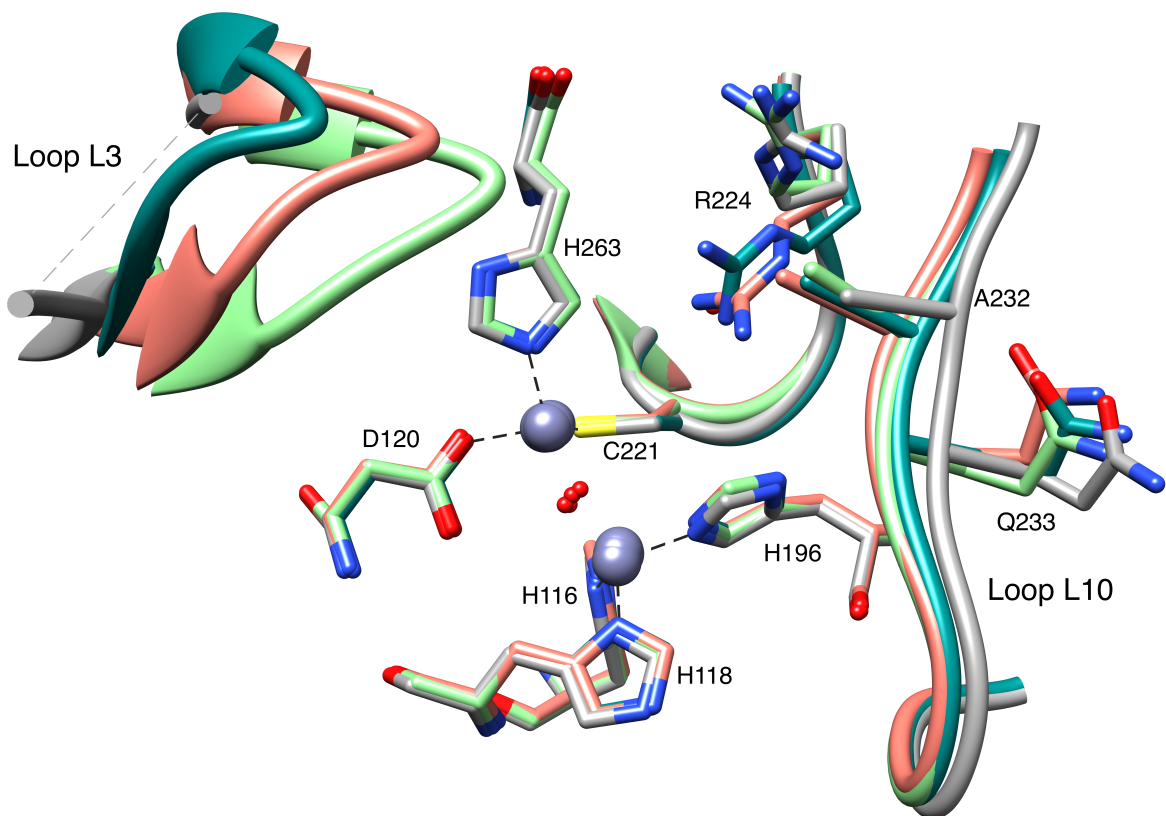

Supplementary Figure 5. Overlay of the four chains of the NDM-1 K224R/G232A/N233Q structure. Chains A, B, C, and D are represented as dark cyan, gray, pale green and salmon, respectively. Zinc ions are represented as gray spheres and the water molecule coordinated by the corresponding zinc ions is shown as a red sphere. Zinc-chelating residues (His116, His118, Asp120, His196, and His263), as well as residues Arg224, Ala232, and Gln233 are represented as stick model in all structures with non-carbon atoms colored by type (N, blue; O, red; S, yellow). The active site loop structures L3 and L10 are labeled.

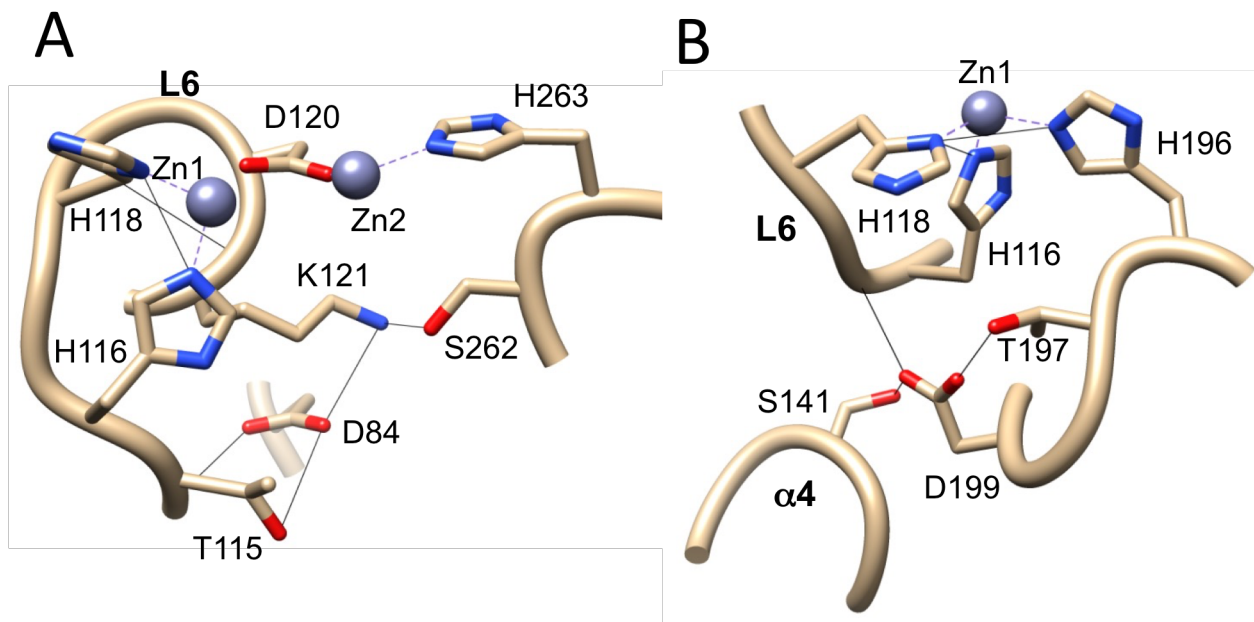

Supplementary Figure 6. Hydrogen bond networks linking loops in the NDM-1 active site. **A.** The network of interactions involving Asp84 and Lys121 is shown. Note that, for clarity, not all zinc ligand residues are shown. **B.** The network of interactions involving Asp199 is shown. Hydrogen bonds are depicted as black lines. Black lines ending at the cartoon tube represent hydrogen bonds to the main chain CO or NH groups. Zinc ions are colored gray and labeled. Carbon is shown in tan, nitrogen is blue and oxygen is red. Side chains of residues are shown and the main chain is shown in cartoon tube.

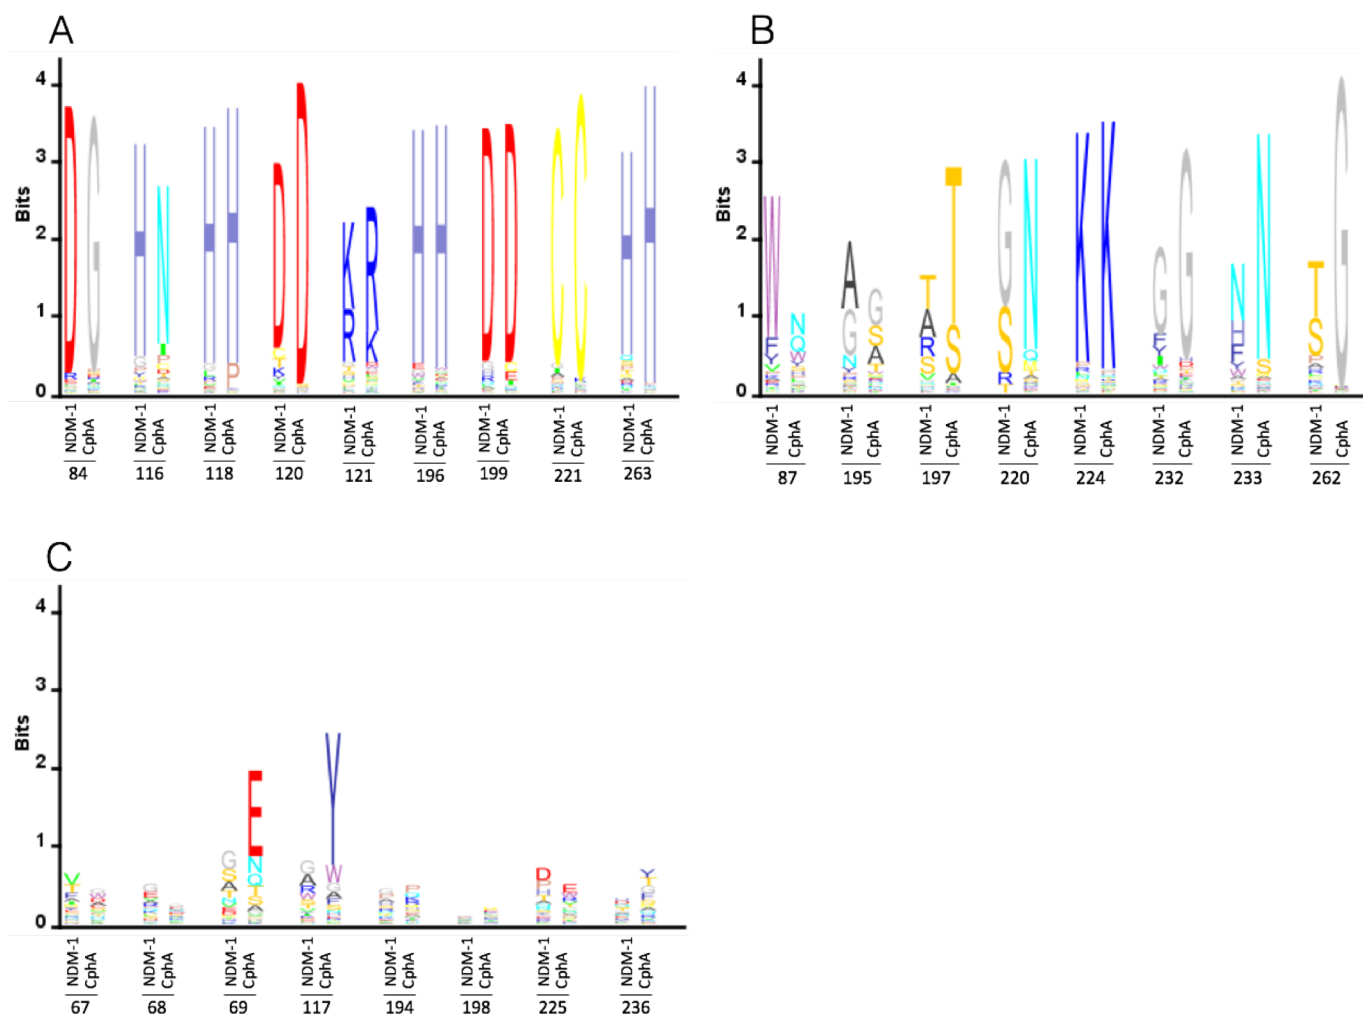

Supplementary Figure 7. Sequence logo comparison of the deep sequencing results for NDM-1 versus CphA  $\beta$ -lactamases. Deep sequencing results from single codon random libraries selected for imipenem resistance for the NDM-1 and CphA metallo- $\beta$ -lactamases are compared using sequence logos. **A**. Essential residues for both enzymes. The wild-type residues dominate among sequences from populations selected for imipenem resistance. **B**. Residue positions where the sequence requirements for imipenem resistance differ between NDM-1 and CphA  $\beta$ -lactamases. **C**. Non-essential residues, no specific residues strongly dominate after the imipenem resistance selection by either NDM-1 or CphA  $\beta$ -lactamase. The data for CphA is from reference <sup>1</sup>.

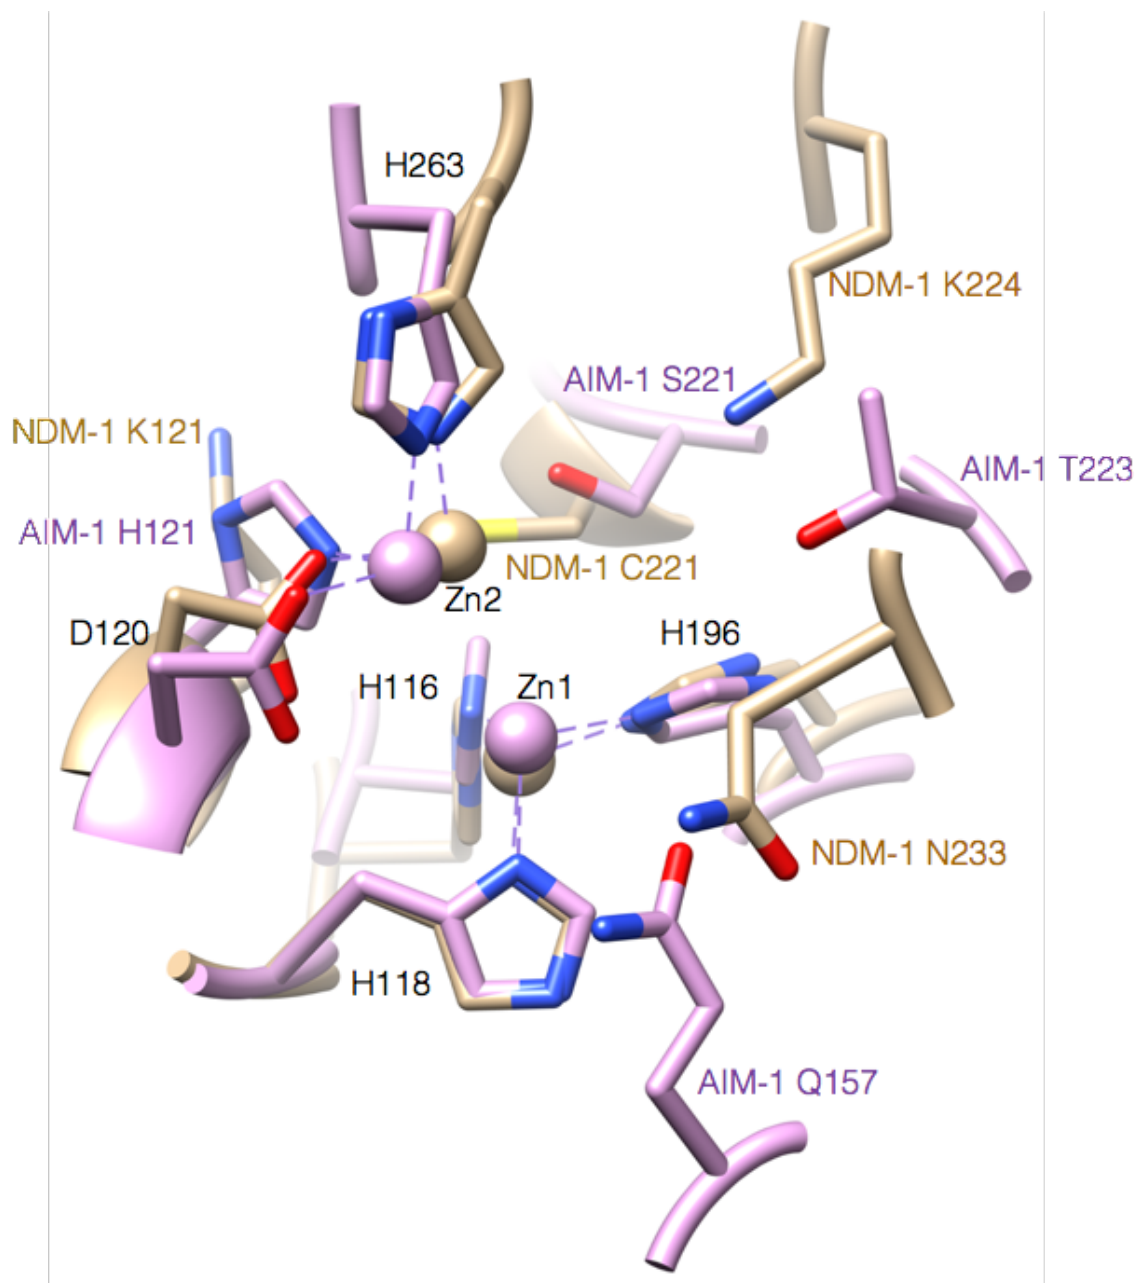

Supplementary Figure 8. Structure alignment of active site residues of subclass B1 NDM-1 (PDB ID: 3SPU)(tan) versus subclass B3 AIM-1  $\beta$ -lactamase (PDB: 4AWZ<sup>2</sup>) (pink). Amino acid residues that are identical in sequence and position are labeled in black. Unique residues are labeled with the enzyme name and colored according to the structure. Note that AIM-1 residues Ser221 and Thr223 are positioned to replace the function of NDM-1 Lys224. Also, the side chain of AIM-1 Gln157 is positioned near that of NDM-1 Asn233. Finally, AIM-1 His121 serves as a zinc ligand in place of Cys221 of NDM-1, which is Ser221 in AIM-1. The zinc ions are shown in tan for NDM-1 and pink for AIM-1.

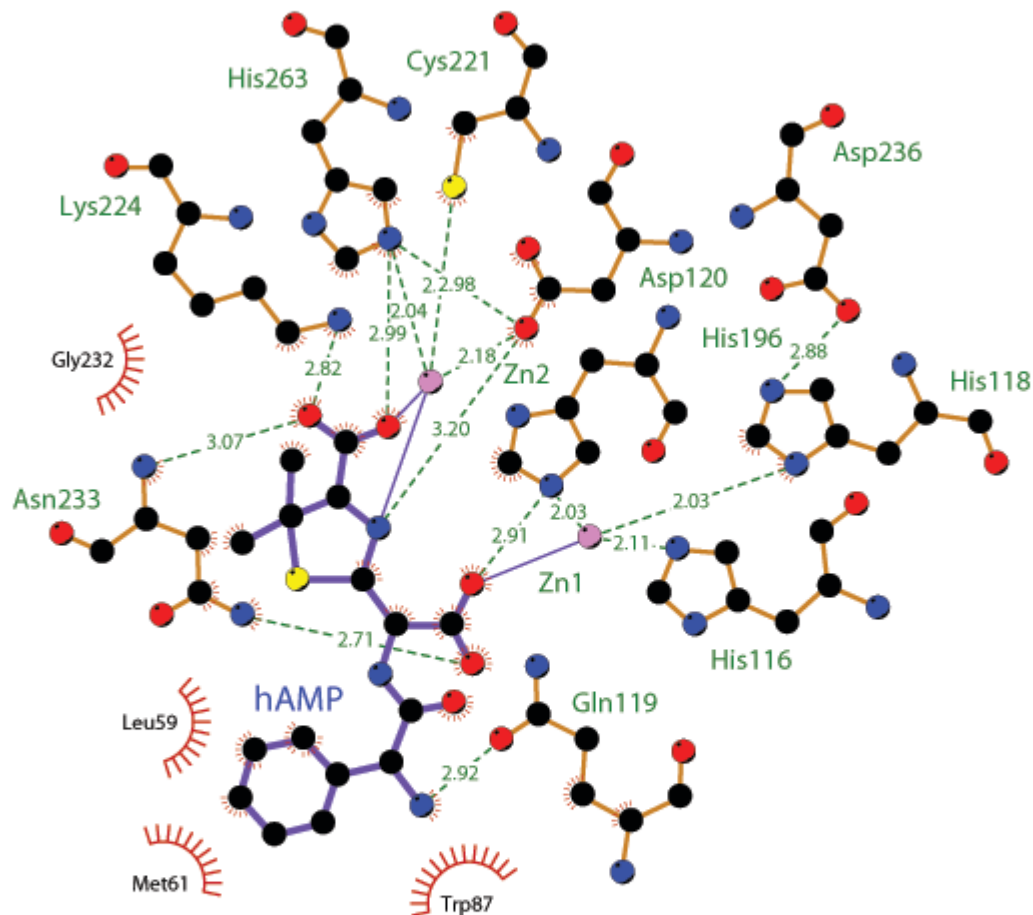

Supplementary Figure 9. Interactions between wild-type NDM-1 and hydrolyzed ampicillin. Ligand-protein and ligand-Zn<sup>2+</sup> interactions in subunit A of NDM-1 in complex with hydrolyzed ampicillin (PDB: 3Q6X)<sup>3</sup> are depicted using LIGPLOT<sup>4</sup>. The hydrolytic product of ampicillin (hAMP) and NDM-1 active site residue are shown as purple and orange sticks, respectively, with atoms colored by type (C, black; N, blue; O, red; S, yellow). Hydrogen bonding interactions are shown as dashed green lines and the length of hydrogen bonds (Å) is labelled. Ligand-protein hydrophobic contacts are shown as red indented curves.



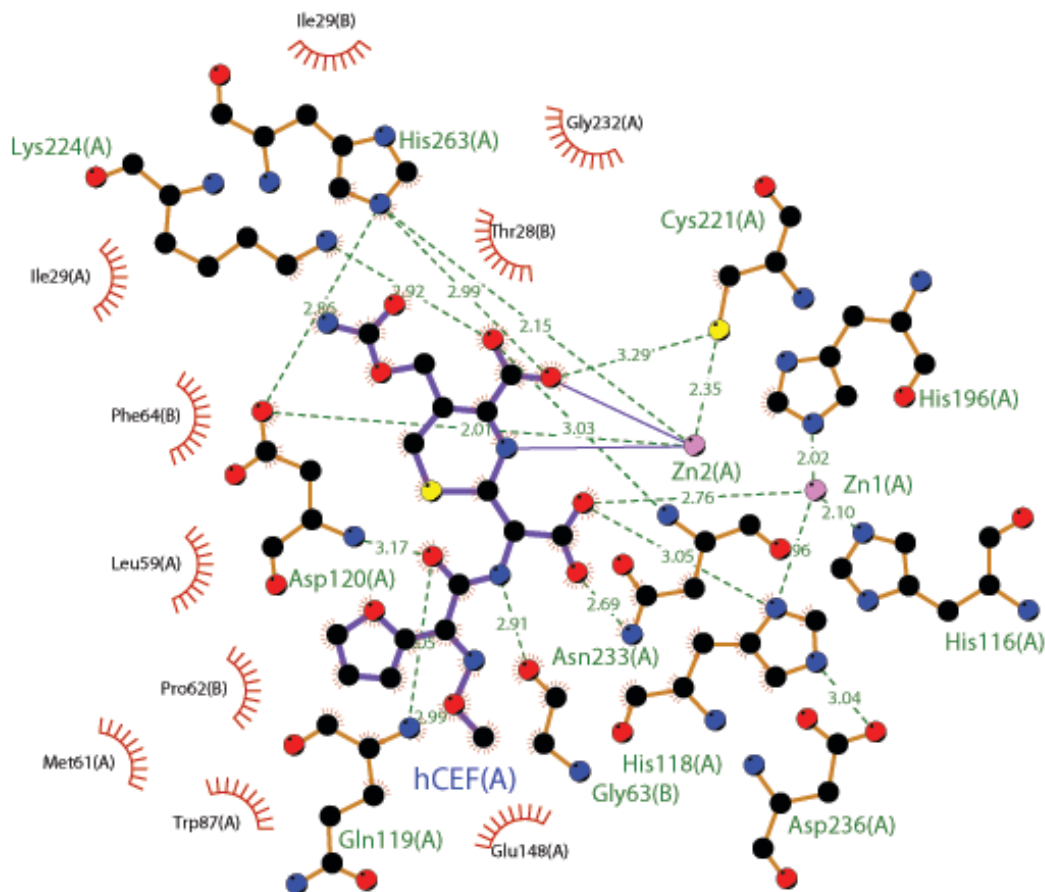

Supplementary Figure 10. Interactions between wild-type NDM-1 and hydrolyzed cefuroxime. Ligand-protein and ligand-Zn<sup>2+</sup> interactions in subunit A of NDM-1 in complex with hydrolyzed cefuroxime (PDB: 4RL0)<sup>5</sup> depicted using LIGPLOT<sup>4</sup>. The hydrolytic product of cefuroxime (hCEF) and NDM-1 active site residue are shown as purple and orange sticks, respectively, with atoms colored by type (C, black; N, blue; O, red; S, yellow). Hydrogen bonding interactions are shown as dashed green lines and the length of hydrogen bonds (Å) is labelled. Ligand-protein hydrophobic contacts are shown as red indented curves. The residues in subunit B of NDM-1 forming hydrophobic interaction with hCEF are also shown.

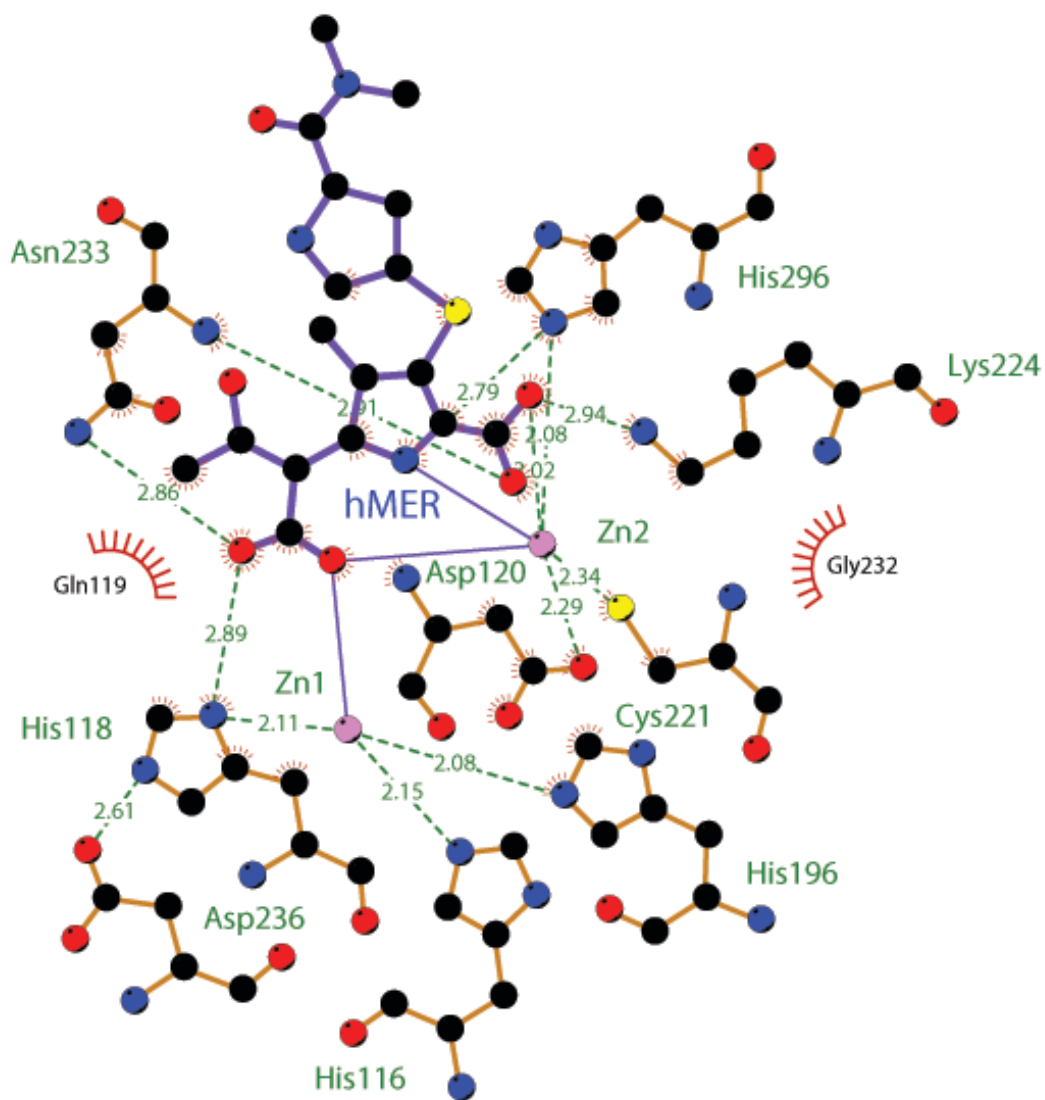

Supplementary Figure 11. Interactions between wild-type NDM-1 and hydrolyzed meropenem. Ligand-protein and ligand-Zn<sup>2+</sup> interactions in subunit A of NDM-1 in complex with hydrolyzed meropenem (PDB: 4EYL)<sup>6</sup> depicted using LIGPLOT<sup>4</sup>. The hydrolytic product of meropenem (hMER) and NDM-1 active site residue are shown as purple and orange sticks, respectively, with atoms colored by type (C, black; N, blue; O, red; S, yellow). Hydrogen bonding interactions are shown as dashed green lines and the length of hydrogen bonds (Å) is labelled. Ligand-protein hydrophobic contacts are shown as red indented curves.



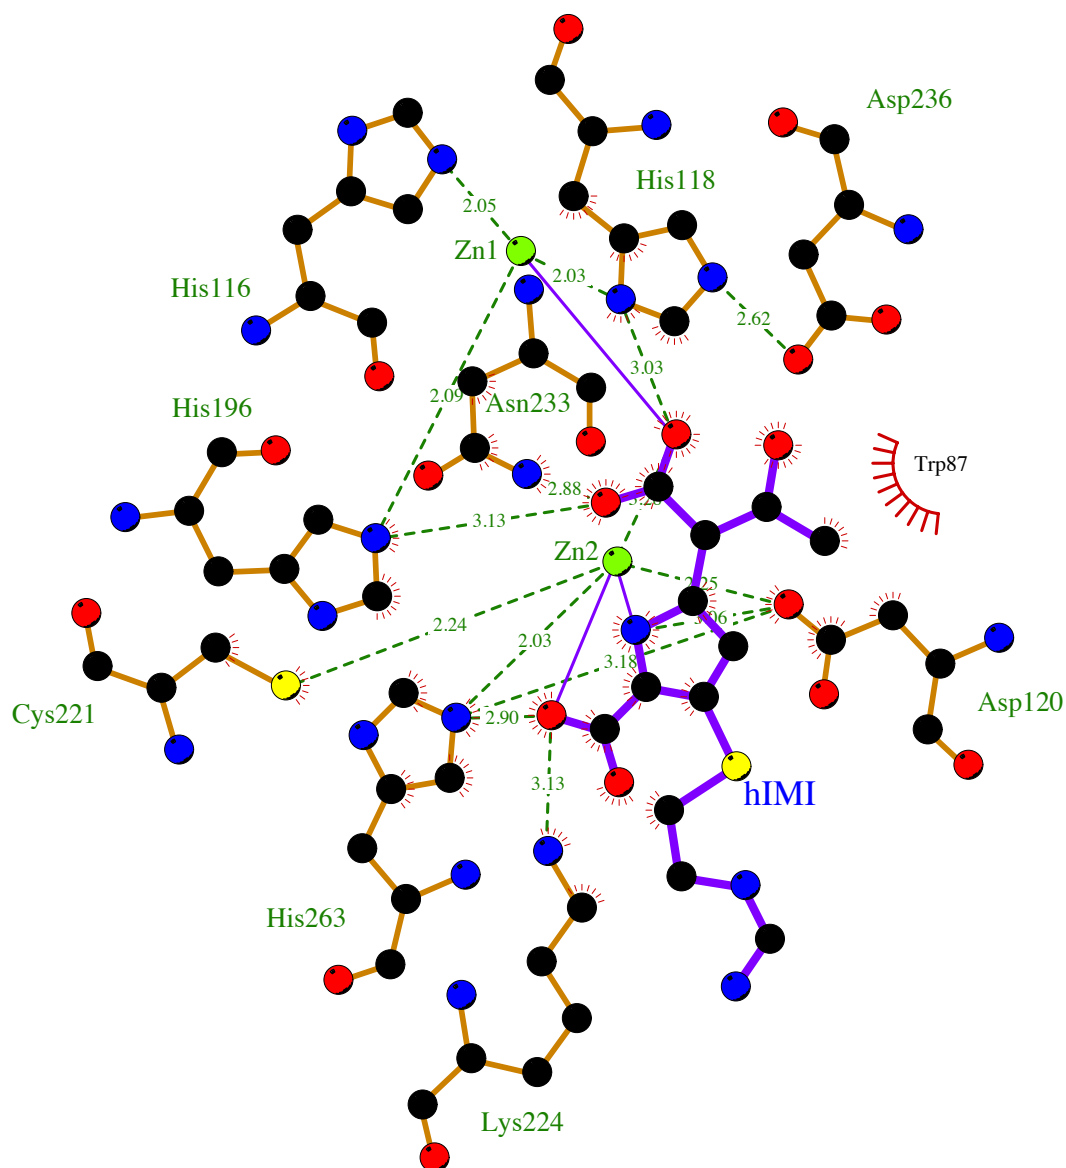

Supplementary Figure 12. Interactions between wild-type NDM-1 and hydrolyzed imipenem. Ligand-protein and ligand-Zn<sup>2+</sup> interactions in subunit A of NDM-1 in complex with hydrolyzed imipenem (PDB: 5YPI)<sup>6</sup> depicted using LIGPLOT<sup>4</sup>. The hydrolytic product of imipenem (hIMI) and NDM-1 active site residues are shown as purple and orange sticks, respectively, with atoms colored by type (C, black; N, blue; O, red; S, yellow). Hydrogen bonding interactions are shown as dashed green lines and the length of hydrogen bonds (Å) is labelled. Ligand-protein hydrophobic contacts are shown as red indented curves.

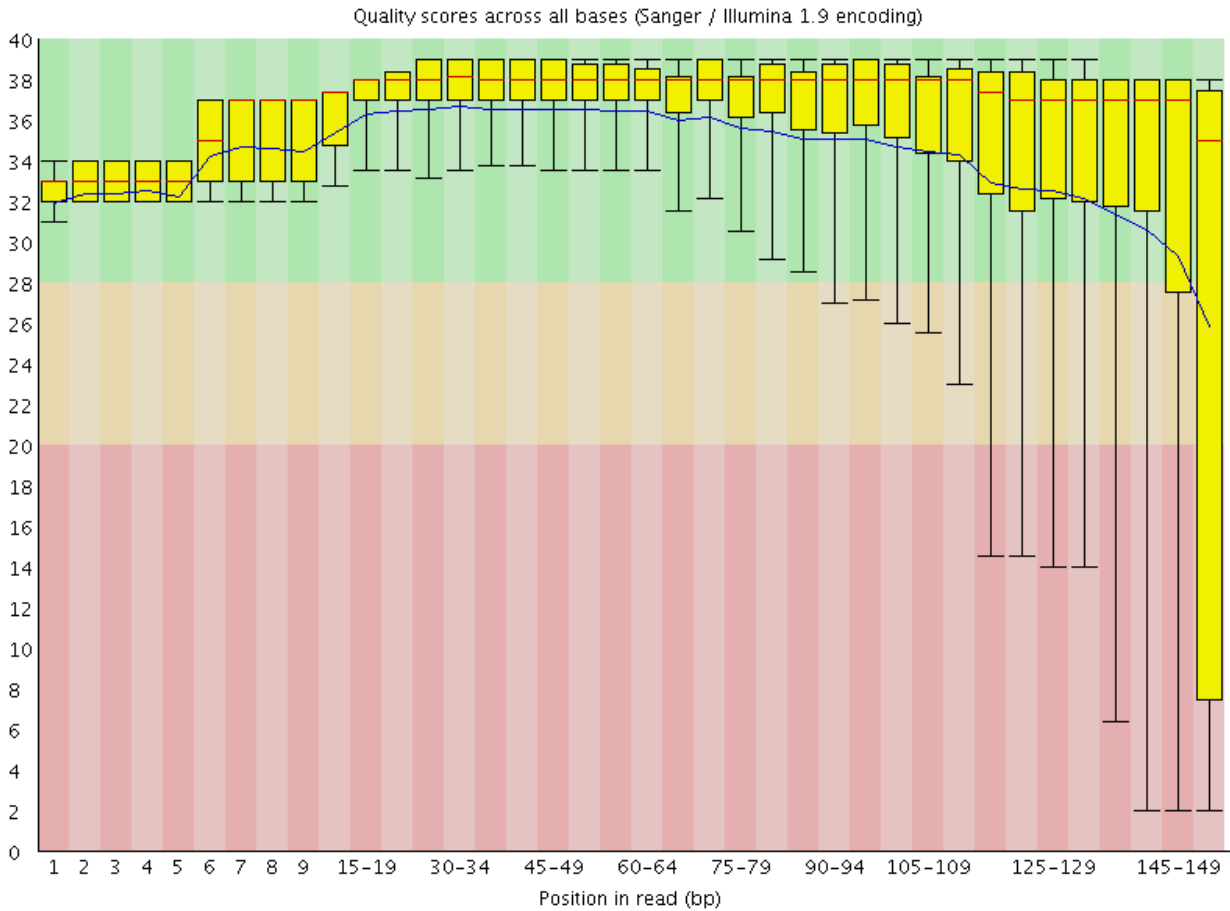

Supplementary Figure 13. Quality scores for Illumina DNA sequencing reads. The scores were generated with the Galaxy web server where the file containing sequencing data was uploaded onto <https://usegalaxy.org/> and the FASTQ groomer was run to convert the FASTQ file to standard format. FastQC Read Quality reports were produced, which indicate per base sequence quality scores. The per base sequence quality is shown as a BoxWhisker type plot to indicate the average quality score at each position across all reads. In the graph, the x-axis shows the position in the sequence read and the y-axis shows the quality scores. Higher scores indicate higher confidence in the base call. The background of the graph divides the y axis into calls of very good quality (green), calls of reasonable quality (orange), and calls of poor quality (red). The yellow bars represent the inter-quartile range (25-75%) and the central red line represents the median value of the quality score. The upper and lower whiskers represent the 10% and 90% points of the quality scores, representatively. The blue line indicates the mean quality score.

**Supplementary Table 1.** Kinetic parameters for  $\beta$ -lactam hydrolysis

| Enzyme            | Kinetic parameters                                  | Substrate <sup>a</sup> |                    |
|-------------------|-----------------------------------------------------|------------------------|--------------------|
|                   |                                                     | Benzylpenicillin       | Meropenem          |
| NDM-1 wild-type   | $K_M$ ( $\mu\text{M}$ )                             | $104 \pm 15$           | $37 \pm 2$         |
|                   | $k_{cat}$ ( $\text{s}^{-1}$ )                       | $739 \pm 11$           | $178 \pm 0.6$      |
|                   | $k_{cat} / K_M$ ( $\mu\text{M}^{-1}\text{s}^{-1}$ ) | $7.17 \pm 0.95$        | $4.79 \pm 0.27$    |
| K224R/G232A/N233Q | $K_M$ ( $\mu\text{M}$ )                             | $843 \pm 161$          | ND                 |
|                   | $k_{cat}$ ( $\text{s}^{-1}$ )                       | $239 \pm 30$           | ND                 |
|                   | $k_{cat} / K_M$ ( $\mu\text{M}^{-1}\text{s}^{-1}$ ) | $0.29 \pm 0.02$        | $0.019 \pm 0.0004$ |

<sup>a</sup>Data are mean and standard deviations of at least two independent experiments; ND, not determined.

**Supplementary Table 2. Primers used in this study**

| Primer name         | Sequence (5' to 3') <sup>a</sup>                                  |
|---------------------|-------------------------------------------------------------------|
| NDM SacI 5'         | CGAGCTCATGGAATTGCCCAATATTATG                                      |
| NDM StrepII XbaI 3' | GCTCTAGATCATTTTTTCGAACTGCGGGTGGCTCCAAGCGCTGCGCAG<br>CTTGTCGGCCATG |
| NDM NdeI 5'         | CGCATATGGGCCAGCAAATGGAAACTG                                       |
| NDM XhoI 3'         | CTCTCGAGTCAGCGCAGCTTGTCGGC                                        |
| NDM62XhoI For       | ATCTCGACATCTCGAGCCGGGTTTCGGGGCAGTCGCTTC                           |
| NDM62XhoI Rev       | GAAACCCGGCTCGAGATGTCGAGATAGGAAGTGTGCTG                            |
| NDM65XhoI For       | GCCGGGTTTCTCGAGGGGCAGTCGCTTCCAACGGTTTTG                           |
| NDM65XhoI Rev       | GCGACTGCCCTCGAGAAACCCGGCATGTCGAGATAGGAAG                          |
| NDM68XhoI For       | GGCAGTCGCTCGAGTCCAACGGTTTGATCGTCAGGGATG                           |
| NDM68XhoI Rev       | CAAACCGTTGGACTCGAGCGACTGCCCCGAAACCCGGCATG                         |
| NDM85XhoI For       | GGTCGATACCTCGAGCCTGGACCGATGACCAGACCGC                             |
| NDM85XhoI Rev       | TCGGTCCAGGCTCGAGGTATCGACCACCAGCACGCGGCC                           |
| NDM117XhoI For      | GTGACTCACTCGAGCGCATCAGGACAAGATGGGCGG                              |
| NDM117XhoI Rev      | TGTCTGATGCGCTCGAGTGAGTCACCACCGCCAGCGCGAC                          |
| NDM120XhoI For      | GCATCAGGACTCGAGAAGATGGGCGGTATGGACGCGC                             |
| NDM120XhoI Rev      | CGCCCATCTTCTCGAGTCCTGATGCGCGTGAGTCACCAC                           |
| NDM195XhoI For      | CCCGGCCCGCTCGAGCCACACCAGTGACAATATCACC                             |
| NDM195XhoI Rev      | CTGGTGTGGCTCGAGCGGGGCCGGGGTAAAATACCTTG                            |
| NDM198XhoI For      | CGGCCACACCTCGAGAGTGACAATATCACCGTTGGGATC                           |
| NDM198XhoI Rev      | TATTGTCACTCTCGAGGTGTGGCCGGGGCCGGGGTAA                             |
| NDM 220 XhoI For    | CGCTTTTGGTCTCGAGGCTGCCTGATCAAGGACAGCAAG                           |
| NDM 220 XhoI Rev    | GATCAGGCAGCCTCGAGACCAAAGCGATGTCGGTGCCG                            |
| NDM223XhoI For      | CTGCCTGATCTCGAGAAGGACAGCAAGGCCAAGTCGCTC                           |
| NDM223XhoI Rev      | TGCTGTCCTTCTCGAGATCAGGCAGCCACCAAAGCGATG                           |
| NDM228XhoI For      | CAGCAAGGCCTCGAGAAGTCGCTCGGCAATCTCGGTGATG                          |
| NDM228XhoI Rev      | CGAGCGACTTCTCGAGGCCTTGCTGTCCTTGATCAGGC                            |
| NDM232XhoI For      | GTCGCTCGGCTCGAGAATCTCGGTGATGCCGACACTGAG                           |
| NDM232XhoI Rev      | CACCGAGATTCTCGAGCCGAGCGACTTGGCCTTGCTGTC                           |
| NDM236XhoI For      | CAATCTCGGTCTCGAGATGCCGACACTGAGCACTACGC                            |
| NDM236XhoI Rev      | TGTCGGCATCTCGAGACCGAGATTGCCGAGCGACTTGG                            |
| NDM262XhoI For      | GATCGTGATGCTCGAGCCATTCCGCCCCGATAGCCG                              |
| NDM262XhoI Rev      | GCGGAATGGCTCGAGCATCACGATCATGCTGGCCTTGG                            |
| NDM 61 libraryFor   | CTATCTCGACNNSCCGGGTTTCGGGGCAGTCGCTTCC                             |
| NDM 61 libraryRev   | CCCGAAACCCGGSNNGTCGAGATAGGAAGTGTGCTGCC                            |
| NDM 62 libraryFor   | TCTCGACATGNNSGGTTTTCGGGGCAGTCGCTTCCAAC                            |
| NDM 62 libraryRev   | TGCCCCGAAACCSNNCATGTCGAGATAGGAAGTGTGC                             |
| NDM 63 libraryFor   | CGACATGCCGNNSTTCGGGGCAGTCGCTTCCAACGGT                             |
| NDM 63 libraryRev   | GACTGCCCCGAASNNCGGCATGTCGAGATAGGAAGTG                             |

|                     |                                          |
|---------------------|------------------------------------------|
| NDM 64 libraryFor   | CATGCCGGGTNNSGGGGCAGTCGCTTCCAACGGTTTG    |
| NDM 64 libraryRev   | AGCGACTGCCCCSNNACCCGGCATGTTCGAGATAGGAAG  |
| NDM 65 libraryFor   | GCCGGGTTTCNNSGCAGTCGCTTCCAACGGTTTGATC    |
| NDM 65 libraryRev   | GGAAGCGACTGCSNNGAAACCCGGCATGTTCGAGATAG   |
| NDM 67 libraryFor   | TTTCGGGGCANNNGCTTCCAACGGTTTGATCGTCAGG    |
| NDM 67 libraryRev   | ACCGTTGGAAGCSNNTGCCCGAAACCCGGCATGTTCG    |
| NDM 68 libraryFor   | CGGGGCAGTCNNSTCCAACGGTTTGATCGTCAGGGAT    |
| NDM 68 libraryRev   | CAAACCGTTGGASNNGACTGCCCGAAACCCGGCATG     |
| NDM 69 libraryFor   | GGCAGTCGCTNNSAACGGTTTGATCGTCAGGGATGGC    |
| NDM 69 libraryRev   | GATCAAACCGTTSNAGCGACTGCCCGAAACCCGGC      |
| NDM 84 libraryFor   | GCTGGTGGTCNNSACCGCCTGGACCGATGACCAGACC    |
| NDM 84 libraryRev   | GGTCCAGGCGGTSNNGACCACCAGCACGCGGCCGCCA    |
| NDM 87 libraryFor   | CGATACCGCCNNSACCGATGACCAGACCGCCCAGATC    |
| NDM 87 libraryRev   | CTGGTCATCGGTSNNGGCGGTATCGACCACCAGCACG    |
| NDM 116 libraryFor  | GGTGGTGACTNNSGCGCATCAGGACAAGATGGGCGGT    |
| NDM 116 libraryRev  | GTCCTGATGCGCSNAGTCACCACCGCCAGCGCGACC     |
| NDM 117 libraryFor  | GGTGACTCACNNSCATCAGGACAAGATGGGCGGTATG    |
| NDM 117 libraryRev  | CTTGTCTGATGSNNGTGAGTCACCACCGCCAGCGCG     |
| NDM 118 libraryFor  | GACTCACGCGNNSCAGGACAAGATGGGCGGTATGGAC    |
| NDM 118 libraryRev  | CATCTTGTCTGSNNGCGGTGAGTCACCACCGCCAGC     |
| NDM 120 libraryFor  | CGCGCATCAGNNSAAGATGGGCGGTATGGACGCGCTG    |
| NDM 120 libraryRev  | ACCGCCCATCTTSNNGTGTGATGCGCGTGAGTCACCACC  |
| NDM 121 libraryFor  | GCATCAGGACNNSATGGGCGGTATGGACGCGCTGCAT    |
| NDM 121 libraryRev  | CATACCGCCCATSNNGTCTGATGCGCGTGAGTCACC     |
| NDM 194 libraryFor  | TTACCCCGGCNNSGGCCACACCAGTGACAATATCACC    |
| NDM 194 libraryRev  | ACTGGTGTGGCCSNNGCCGGGGTAAAATACCTTGAGC    |
| NDM 195 libraryFor  | CCCCGGCCCCNNSCACACCAGTGACAATATCACCGTT    |
| NDM 195 libraryRev  | GTCACTGGTGTGSNNGGGGCCGGGGTAAAATACCTTG    |
| NDM 196 libraryFor  | CGGCCCGGCNNSACCAGTGACAATATCACCGTTGGG     |
| NDM 196 libraryRev  | ATTGTCACTGGTGSNNGCCGGGGCCGGGGTAAAATACC   |
| NDM 197 library For | CCCCGGCCACNNSAGTGACAATATCACCGTTGGGATC    |
| NDM 197 libraryRev  | GATATTGTCACTSNNGTGGCCGGGGCCGGGGTAAAAT    |
| NDM 198 libraryFor  | CGGCCACACCNNSGACAATATCACCGTTGGGATCGAC    |
| NDM 198 libraryRev  | GGTGATATTGTCSNNGGTGTGGCCGGGGCCGGGGTAA    |
| NDM 199 library For | CCACACCAGTNNSAATATCACCGTTGGGATCGACGGC    |
| NDM 199 libraryRev  | AACGGTGATATTSNNACTGGTGTGGCCGGGGCCGGGG    |
| NDM 220 libraryFor  | CGCTTTTGGTNNSTGCCTGATCAAGGACAGCAAGGCC    |
| NDM 220 libraryRev  | CTTGATCAGGCASNACCAAAAAGCGATGTTCGGTGCCG   |
| NDM 221 libraryFor  | CTTTTGGTGGCNNSCTGATCAAGGACAGCAAGGCCAAG   |
| NDM 221 libraryRev  | GTCTTGTGATCAGSNNGCCACCAAAAAGCGATGTTCGGTG |
| NDM 224 libraryFor  | CTGCCTGATCNNSGACAGCAAGGCCAAGTCGCTCGGC    |
| NDM 224 libraryRev  | GGCCTTGCTGTCSNNGATCAGGCAGCCACCAAAAAGCG   |
| NDM 225 libraryFor  | CCTGATCAAGNNSAGCAAGGCCAAGTCGCTCGGCAAT    |

NDM 225 libraryRev CTTGGCCTTGCTSNCTTGATCAGGCAGCCACCAAAG  
 NDM 228 libraryFor GGACAGCAAGNNSAAGTCGCTCGGCAATCTCGGTGAT  
 NDM 228 libraryRev GCCGAGCGACTTSNNCTTGCTGTCCTTGATCAGGCAG  
 NDM 232 libraryFor CAAGTCGCTCNNSAATCTCGGTGATGCCGACACTGAG  
 NDM 232 libraryRev ATCACCGAGATTSSNNGAGCGACTTGGCCTTGCTGTCC  
 NDM 233 libraryFor GTCGCTCGGCNNSCTCGGTGATGCCGACACTGAGCAC  
 NDM 233 libraryRev GGCATCACCGAGSNNGCCGAGCGACTTGGCCTTGCTG  
 NDM 236 libraryFor CAATCTCGGTNNSGCCGACACTGAGCACTACGCCGCG  
 NDM 236 libraryRev CTCAGTGTGGCSNNACCGAGATTGCCGAGCGACTTG  
 NDM 262 libraryFor GATCGTGATGNNSCATTCCGCCCCCGATAGCCGCGCC  
 NDM 262 libraryRev GGGGGCGGAATGSNNCATCACGATCATGCTGGCCTTG  
 NDM 263 libraryFor CGTGATGAGCANNSTCCGCCCCCGATAGCCGCGCCGCA  
 NDM 263 libraryRev ATCGGGGGCGGASNNGCTCATCACGATCATGCTGGCC  
 NDM F64H For CATGCCGGGTCACGGGGCAGTCGCTTCCAACGGTTTG  
 NDM F64H Rev AGCGACTGCCCCGTGACCCGGCATGTGAGATAGGAAG  
 NDM D84E For GCTGGTGGTCGAGACCGCCTGGACCGATGACCAGACC  
 NDM D84E Rev GGTCCAGGCGGTCTCGACCACCAGCACGCGGCCGCCA  
 NDM W87P For CGATACCGCCCCGACCGATGACCAGACCGCCCAGATC  
 NDM W87P Rev CTGGTCATCGGTGGGGCGGTATCGACCACCAGCACG  
 NDM K121R For GCATCAGGACCGCATGGGGCGGTATGGACGCGCTGCAT  
 NDM K121R Rev CATAACCGCCCATGCGGTCTGATGCGCGTGAGTCACC  
 NDM K121T For GCATCAGGACACCATGGGGCGGTATGGACGCGCTGCAT  
 NDM K121T Rev CATAACCGCCCATGGTGTCTGATGCGCGTGAGTCACC  
 NDM G195A For CCCC GGCCCCGCGCACACCAGTGACAATATCACCGTT  
 NDM G195A Rev GTCACTGGTGTGCGCGGGGCCGGGTAAAATACCTTG  
 NDM D199E For CCACACCAGTGAGAATATCACCGTTGGGATCGACGGC  
 NDM D199E Rev AACGGTGATATTCTCACTGGTGTGGCCGGGGCCGGGG  
 NDM K224R For CTGCCTGATCCGCGACAGCAAGGCCAAGTCGCTCGGC  
 NDM K224R Rev GGCCTTGCTGTCGCGGATCAGGCAGCCACCAAAGCG  
 NDM K224H For CTGCCTGATCCACGACAGCAAGGCCAAGTCGCTCGGC  
 NDM K224H Rev GGCCTTGCTGTCGTGGATCAGGCAGCCACCAAAGCG  
 NDM D225E For CCTGATCAAGGAGAGCAAGGCCAAGTCGCTCGGCAAT  
 NDM D225E Rev CTTGGCCTTGCTCTCCTTGATCAGGCAGCCACCAAAG  
 NDM G232A For CAAGTCGCTCGCGAATCTCGGTGATGCCGACACTGAG  
 NDM G232A Rev ATCACCGAGATTGCGGAGCGACTTGGCCTTGCTGTCC  
 NDM N233H For GTCGCTCGGCCACCTCGGTGATGCCGACACTGAGCAC  
 NDM N233H Rev GGCATCACCGAGGTGGCCGAGCGACTTGGCCTTGCTG  
 NDM N233Q For GTCGCTCGGCCAGCTCGGTGATGCCGACACTGAGCAC  
 NDM N233Q Rev GGCATCACCGAGCTGGCCGAGCGACTTGGCCTTGCTG  
 NDM G232AN233Q CAAGTCGCTCGCGCAGCTCGGTGATGCCGACACTGAG  
 For  
 NDM G232AN233Q ATCACCGAGCTGCGCGAGCGACTTGGCCTTGCTGTCC  
 Rev

|            |                                   |
|------------|-----------------------------------|
| NDM61Naive | NKKNKKCCTGCGACACACTTCCTATCTCGAC   |
| NDM61Amp   | NKKNKKTGCAGAGCACACTTCCTATCTCGAC   |
| NDM61CT    | NKKNKKACCTAGGCACACTTCCTATCTCGAC   |
| NDM61IMP   | NKKNKKTGTGATCCCACACTTCCTATCTCGAC  |
| NDM62Naive | NKKNKKATCTTGCACACTTCCTATCTCGACATG |
| NDM62Amp   | NKKNKKTCTCCATACTTCCTATCTCGACATG   |
| NDM62CT    | NKKNKKCATCGAGACTTCCTATCTCGACATG   |
| NDM62IMP   | NKKNKKTTCGAGCACTTCCTATCTCGACATG   |
| NDM63Naive | NKKNKKAGTTGGTTCCTATCTCGACATGCCG   |
| NDM63Amp   | NKKNKKGTACCGGTCCTATCTCGACATGCCG   |
| NDM63CT    | NKKNKKCGGAGTTTCCTATCTCGACATGCCG   |
| NDM63IMP   | NKKNKKACTTCAATCCTATCTCGACATGCCG   |
| NDM64Naive | NKKNKKTGATAGTTATCTCGACATGCCGGGT   |
| NDM64Amp   | NKKNKKGATCCAATATCTCGACATGCCGGGT   |
| NDM64CT    | NKKNKKCAGGTCGTATCTCGACATGCCGGGT   |
| NDM64IMP   | NKKNKKCGCATTATATCTCGACATGCCGGGT   |
| NDM61to64R | TGAGGATCTGGGCGGTCT                |
| NDM65Naive | NKKNKKGGTACCTCTCGACATGCCGGGTTC    |
| NDM65Amp   | NKKNKKGGACGCACTCGACATGCCGGGTTC    |
| NDM65CT    | NKKNKKGAGATTCCTCGACATGCCGGGTTC    |
| NDM65IMP   | NKKNKKGAGCATGCTCGACATGCCGGGTTC    |
| NDM67Naive | NKKNKKGTTGCGTATGCCGGGTTCGGGGCA    |
| NDM67Amp   | NKKNKKCCAATGCATGCCGGGTTCGGGGCA    |
| NDM67CT    | NKKNKKCGAGATCATGCCGGGTTCGGGGCA    |
| NDM67IMP   | NKKNKKCATATTGATGCCGGGTTCGGGGCA    |
| NDM68Naive | NKKNKKGACGTCACCGGGTTCGGGGCAGTC    |
| NDM68Amp   | NKKNKKTGGCATCCCGGGTTCGGGGCAGTC    |
| NDM68CT    | NKKNKKGTAATTGCCGGGTTCGGGGCAGTC    |
| NDM68IMP   | NKKNKKCCTATCTCCGGGTTCGGGGCAGTC    |
| NDM69Naive | NKKNKKCAATCGGGGTTCGGGGCAGTCGCT    |
| NDM69Amp   | NKKNKKGCGGCATGGTTTCGGGGCAGTCGCT   |
| NDM69CT    | NKKNKKAGTACTGGTTCGGGGCAGTCGCT     |
| NDM69IMP   | NKKNKKTACTATTGGTTCGGGGCAGTCGCT    |
| NDM65to69R | GCTTGATCCAGTTGAGGATCTG            |
| NDM84Naive | NKKNKKCCGGATGGGCCGCGTGCTGGTGGTC   |
| NDM84Amp   | NKKNKKACCATGAGGCCGCGTGCTGGTGGTC   |
| NDM84CT    | NKKNKKCGGTTCTGGGCCGCGTGCTGGTGGTC  |
| NDM84IMP   | NKKNKKTATTCCAGGCCGCGTGCTGGTGGTC   |
| NDM87Naive | NKKNKKCCTCCTGCTGGTGGTCGATAACCGCC  |
| NDM87Amp   | NKKNKKAGGTATTCTGGTGGTCGATAACCGCC  |
| NDM87CT    | NKKNKKGCATTCGCTGGTGGTCGATAACCGCC  |
| NDM87IMP   | NKKNKKTTCGGAACCTGGTGGTCGATAACCGCC |
| NDM84to87R | TCTTGTCTGATGCGCGTG                |

|              |                                   |
|--------------|-----------------------------------|
| NDM116Naive  | NKKNKKTGAATTGCGCTGGCGGTGGTGACT    |
| NDM116Amp    | NKKNKKCTGCGCGGCGCTGGCGGTGGTGACT   |
| NDM116CT     | NKKNKKAGACCTTGGCGCTGGCGGTGGTGACT  |
| NDM116IMP    | NKKNKKGTCCAGTGGCGCTGGCGGTGGTGACT  |
| NDM117Naive  | NKKNKKACCTGCTCTGGCGGTGGTGACTCAC   |
| NDM117Amp    | NKKNKKCCGGTACCTGGCGGTGGTGACTCAC   |
| NDM117CT     | NKKNKKCTTGACCCTGGCGGTGGTGACTCAC   |
| NDM117IMP    | NKKNKKCATCATTCTGGCGGTGGTGACTCAC   |
| NDM118Naive  | NKKNKKTCTGACTGCGGTGGTGACTCACGCG   |
| NDM118Amp    | NKKNKKTCTAGTTGCGGTGGTGACTCACGCG   |
| NDM118CT     | NKKNKKGCCATAGGCGGTGGTGACTCACGCG   |
| NDM118IMP    | NKKNKKACCGTCGGCGGTGGTGACTCACGCG   |
| NDM116to118R | CAACCATCCCCTCTTGCG                |
| NDM120Naive  | NKKNKKCTTGTTGTGACTCACGCGCATCAG    |
| NDM120Amp    | NKKNKKTACGCCGGTGACTCACGCGCATCAG   |
| NDM120CT     | NKKNKKGGACTGCGTGACTCACGCGCATCAG   |
| NDM120IMP    | NKKNKKGCGGAGGTGACTCACGCGCATCAG    |
| NDM121Naive  | NKKNKKGTTCGAGACTCACGCGCATCAGGAC   |
| NDM121Amp    | NKKNKKCATACGTACTCACGCGCATCAGGAC   |
| NDM121CT     | NKKNKKTCAGTATACTCACGCGCATCAGGAC   |
| NDM121IMP    | NKKNKKCTAAGTAACTCACGCGCATCAGGAC   |
| NDM120to121R | AAGTCAGGCTGTGTTGCG                |
| NDM194Naive  | NKKNKKT TAGCTTAAGGTATTTTACCCCGGC  |
| NDM194Amp    | NKKNKKCGCCGTCAAGGTATTTTACCCCGGC   |
| NDM194CT     | NKKNKKGTCTTCTAAGGTATTTTACCCCGGC   |
| NDM194IMP    | NKKNKKGCCGACAAGGTATTTTACCCCGGC    |
| NDM195Naive  | NKKNKKAAGCTGAGTATTTTACCCCGGCCCC   |
| NDM195Amp    | NKKNKKGCGCTCTGTATTTTACCCCGGCCCC   |
| NDM195CT     | NKKNKKCGTAGGCGTATTTTACCCCGGCCCC   |
| NDM195IMP    | NKKNKKATGATTAGTATTTTACCCCGGCCCC   |
| NDM196Naive  | NKKNKKGCAGGTTTTTTACCCCGGCCCCGGC   |
| NDM196Amp    | NKKNKKAATCGTCTTTTACCCCGGCCCCGGC   |
| NDM196CT     | NKKNKKCGGCCTATTTTACCCCGGCCCCGGC   |
| NDM196IMP    | NKKNKKCTATGCCTTTTACCCCGGCCCCGGC   |
| NDM194to196R | CACCGAGATTGCCGAGCG                |
| NDM197Naive  | NKKNKKGGTTGAATACCCCGGCCCCGGCCAC   |
| NDM197Amp    | NKKNKKGAGTTAATACCCCGGCCCCGGCCAC   |
| NDM197CT     | NKKNKKTAGACTATAACCCCGGCCCCGGCCAC  |
| NDM197IMP    | NKKNKKT CATGCATAACCCCGGCCCCGGCCAC |
| NDM198Naive  | NKKNKKGCTTATCCCGGCCCCGGCCACACC    |
| NDM198Amp    | NKKNKKCAAGGCTCCCGGCCCCGGCCACACC   |
| NDM198CT     | NKKNKKAGGTTGGCCCCGGCCCCGGCCACACC  |
| NDM198IMP    | NKKNKKCTTCTGCCCGGCCCCGGCCACACC    |



|              |                                  |
|--------------|----------------------------------|
| NDM199Naive  | NKKNKKTAAATTCTGGCCCCGGCCACACCAGT |
| NDM199Amp    | NKKNKKGATGCTGGGCCCCGGCCACACCAGT  |
| NDM199CT     | NKKNKKCCTAGAAGGCCCGCCACACCAGT    |
| NDM199IMP    | NKKNKKTCTAGAGGGGCCCGCCACACCAGT   |
| NDM197to199R | CATCACCGAGATTGCCGAG              |
| NDM221Naive  | NKKNKKTATCCGGGACATCGCTTTTGGTGGC  |
| NDM221Amp    | NKKNKKGAGCGGCGACATCGCTTTTGGTGGC  |
| NDM221CT     | NKKNKKGGTCTGTTGACATCGCTTTTGGTGGC |
| NDM221IMP    | NKKNKKGCTGGGACATCGCTTTTGGTGGC    |
| NDM224Naive  | NKKNKKGGAATAATTTGGTGGCTGCCTGATC  |
| NDM224Amp    | NKKNKKTATTGCCATTTGGTGGCTGCCTGATC |
| NDM224CT     | NKKNKKTATACGTTTGGTGGCTGCCTGATC   |
| NDM224IMP    | NKKNKKGATTAGCTTTGGTGGCTGCCTGATC  |
| NDM225Naive  | NKKNKKGAGAAGTCGGTGGCTGCCTGATCAAG |
| NDM225Amp    | NKKNKKTATAGTACGGTGGCTGCCTGATCAAG |
| NDM225CT     | NKKNKKGATCTCGGGTGGCTGCCTGATCAAG  |
| NDM225IMP    | NKKNKKGCTGCGGGTGGCTGCCTGATCAAG   |
| NDM221to225R | CATGCTGGCCTTGGGGAA               |
| NDM228Naive  | NKKNKKGCCCTCCTGATCAAGGACAGCAAG   |
| NDM228Amp    | NKKNKKTGAAGCCTGATCAAGGACAGCAAG   |
| NDM228CT     | NKKNKKTGGATATCTGATCAAGGACAGCAAG  |
| NDM228IMP    | NKKNKKGATATAACCTGATCAAGGACAGCAAG |
| NDM228R      | CGGAATGGCTCATCACGATC             |
| NDM232Naive  | NKKNKKTAAAGGAGCAAGGCCAAGTCGCTC   |
| NDM232Amp    | NKKNKKGTTGGCGAGCAAGGCCAAGTCGCTC  |
| NDM232CT     | NKKNKKGCGAGTAAGCAAGGCCAAGTCGCTC  |
| NDM232IMP    | NKKNKKTGGCGCTAGCAAGGCCAAGTCGCTC  |
| NDM233Naive  | NKKNKKTACTTAAAGGCCAAGTCGCTCGGC   |
| NDM233Amp    | NKKNKKTGACCAAAAAGGCCAAGTCGCTCGGC |
| NDM233CT     | NKKNKKTATGCAACAAGGCCAAGTCGCTCGGC |
| NDM233IMP    | NKKNKKTAGAGGATAAGGCCAAGTCGCTCGGC |
| NDM236Naive  | NKKNKKGACCGCCTCGCTCGGCAATCTCGGT  |
| NDM236Amp    | NKKNKKTATCATATTCGCTCGGCAATCTCGGT |
| NDM236CT     | NKKNKKGCGTACCTCGCTCGGCAATCTCGGT  |
| NDM236IMP    | NKKNKKGCTTCTTTCGCTCGGCAATCTCGGT  |
| NDM232to236R | CTATCGGGGGCGGAATGG               |
| NDM262Naive  | NKKNKKTCAACGGGCCAGCATGATCGTGATG  |
| NDM262Amp    | NKKNKKGATTGCTGCCAGCATGATCGTGATG  |
| NDM262CT     | NKKNKKTACGGAGCGCCAGCATGATCGTGATG |
| NDM262IMP    | NKKNKKTAGAGTTGGCCAGCATGATCGTGATG |
| NDM263Naive  | NKKNKKGAGTCTAGCATGATCGTGATGAGC   |
| NDM263Amp    | NKKNKKAAGATAGAGCATGATCGTGATGAGC  |
| NDM263CT     | NKKNKKTACTGCTTAGCATGATCGTGATGAGC |

|              |                                 |
|--------------|---------------------------------|
| NDM263IMP    | NKKNKKCGGTAACAGCATGATCGTGATGAGC |
| NDM262to263R | GGGCTTGCGACTCTAGATC             |
| NDM220Naive  | NKKNKKTATCCGGACCGACATCGCTTTTGGT |
| NDM220Amp    | NKKNKKAGGCGGCACCGACATCGCTTTTGGT |
| NDM220CT     | NKKNKKGGTCGTTACCGACATCGCTTTTGGT |
| NDM220IMP    | NKKNKKCCGCTGGACCGACATCGCTTTTGGT |
| NDM220R      | GATCATGCTGGCCTTGGG              |

---

<sup>a</sup> N represents a mix of the 4 nucleotides, S indicates G and C, and K indicates G and T

## Supplementary References

1. Sun Z, Mehta SC, Adamski CJ, Gibbs RA, Palzkill T. Deep sequencing of random mutant libraries reveals the active site of the narrow specificity CphA metallo-beta-lactamase is fragile to mutations. *Sci Rep* **6**, 33195 (2016).
2. Leiros H-KS, *et al.* Crystal structure of the mobile metallo-beta-lactamase AIM-1 from *Pseudomonas aeruginosa*: Insights into antibiotic binding and the role of Gln157. *Antimicrob Agents Chemother* **56**, 4341-4353 (2012).
3. Zhang H, Hao Q. Crystal structure of NDM-1 reveals a common beta-lactam hydrolysis mechanism. *FASEB J* **25**, 2574-2582 (2011).
4. Laskowski RA, Swindells MB. LigPlot+: multiple ligand-protein interaction diagrams for drug discovery. *J Chem Inf Model* **51**, 2778-2786 (2011).
5. Feng H, *et al.* Structural and mechanistic insights into NDM-1 catalyzed hydrolysis of cephalosporins. *J Am Chem Soc* **136**, 14694-14697 (2014).
6. King DT, Worrall LJ, Gruninger R, Strynadka NC. New Delhi metallo-beta-lactamase: structural insights into beta-lactam recognition and inhibition. *J Am Chem Soc* **134**, 11362-11365 (2012).
